# Supplementary material for: Tracing changes in atmospheric moisture supply to the dryingSouthwest China
Source: Copernicus journal article supplement (doi:10.5194/acp-2017-147), 2017-03-17
Supplement: Supplementary file 1 [file acp-2017-147-supplement.pdf]

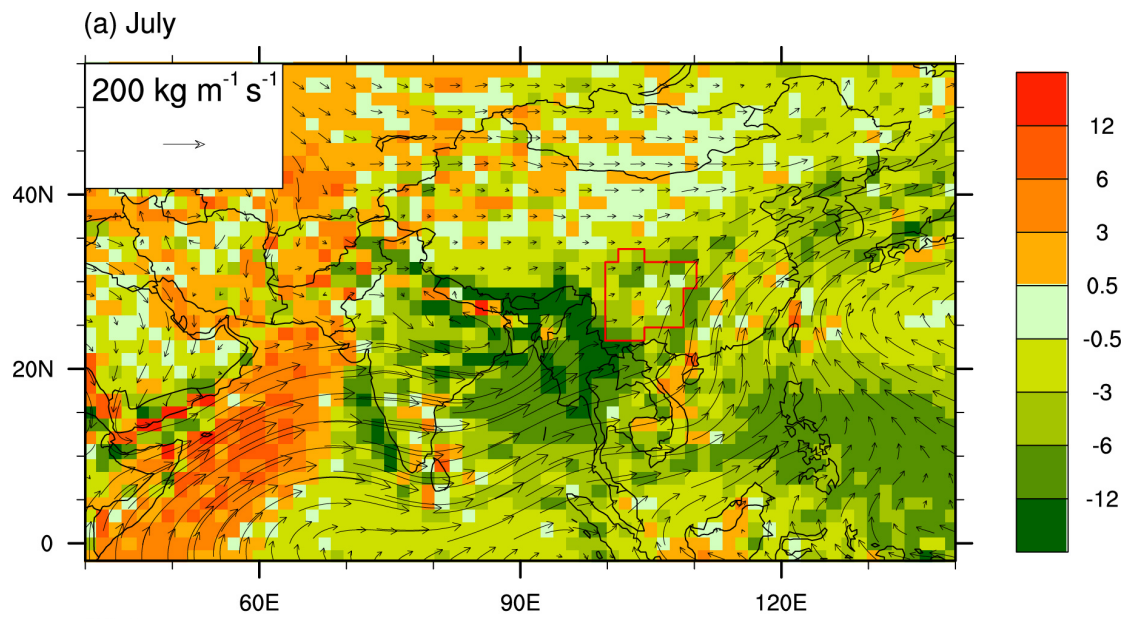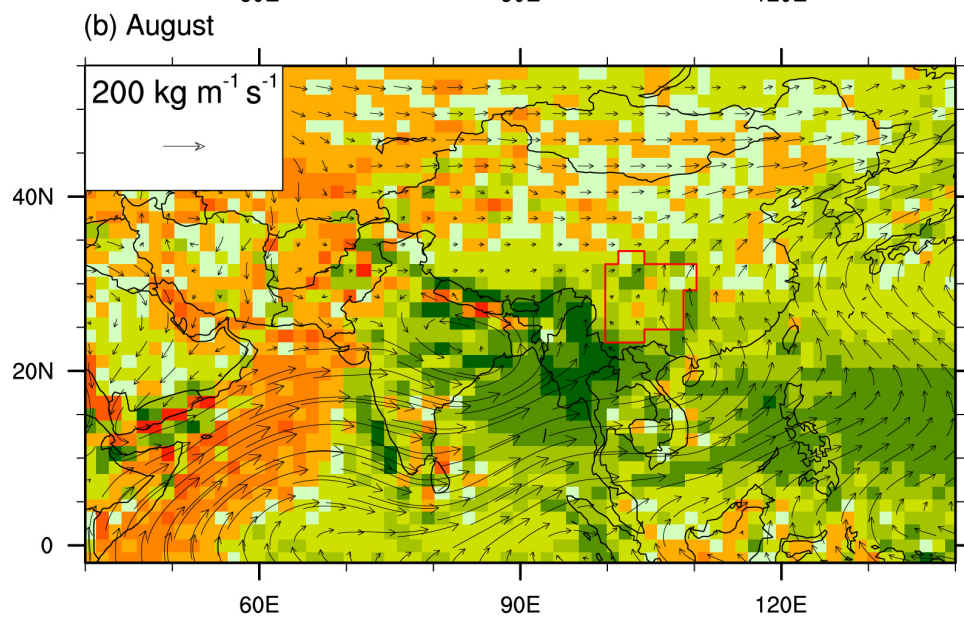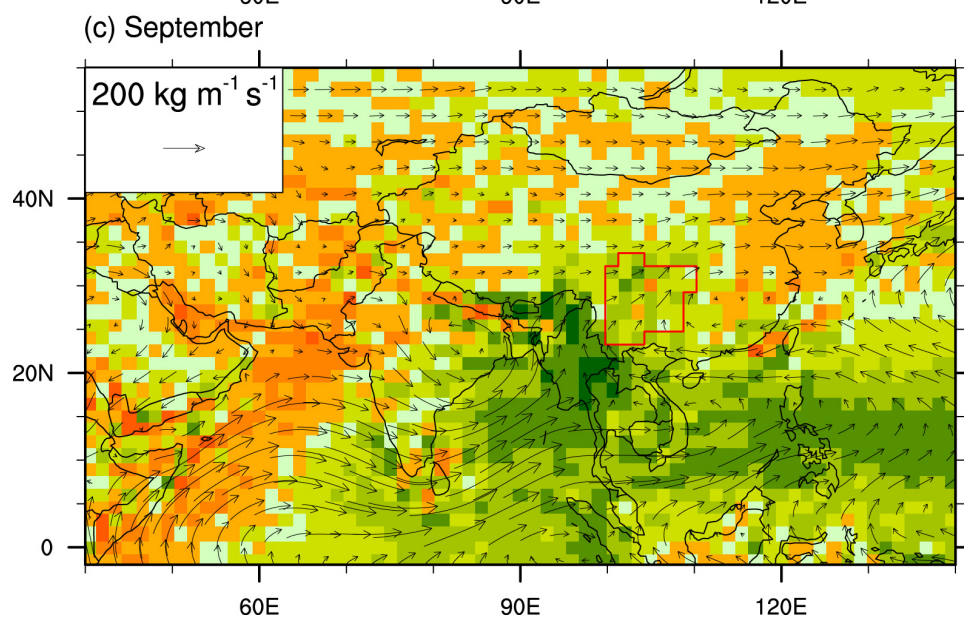

2        Figure S1. The climatological moisture transport (vectors) and its divergence  
3        (shading,  $10^{-5} \text{ kg m}^{-2} \text{ s}^{-1}$ ) from July to September during 1979–2013.  
4
